# Supplementary material
Source: publisher figshare collection journal article supplement (https://sage.figshare.com/ndownloader/files/30778895)
Supplement: Supplementary file 1 [file 30778895]

**Table S2**. Starch counts by artifact

| Artifact ID | Site | Context | Artifact type | Acorns | Kudzu vine root | Snake gourd root | Rice  (compound count) | Lily Bulb | Yam | Fern root | Job's tears | Bean | Lotus root | Ginger | Barnyard grasses | UNID USO | UNID | Total | grinding damage | cooking damage |
| --- | --- | --- | --- | --- | --- | --- | --- | --- | --- | --- | --- | --- | --- | --- | --- | --- | --- | --- | --- | --- |
| Basin 1 | SS | Pit | Basin | 1 |  |  |  | 2 |  |  |  |  |  |  |  |  | 1 | 4 | P |  |
| Basin 2 | SS | Pit | Basin | 12 |  | 1 |  |  |  |  |  |  |  |  |  |  | 7 | 20 | P |  |
| Basin 3 | SS | Pit | Basin | 3 |  | 3 | 3 | 2 |  |  | 3 |  |  |  |  | 7 | 16 | 37 | P |  |
| Basin 4 | SS | House | Basin | 1 |  |  |  |  |  |  |  |  |  |  |  |  | 2 | 3 | P |  |
| Basin 5 | SS | House | Basin | 4 |  |  |  |  |  |  |  |  |  |  |  |  |  | 4 |  |  |
| Basin 6 | SS | House | Basin | 23 | 2 | 1 |  | 1 |  |  |  |  |  |  |  | 1 | 8 | 36 | P |  |
| Basin 7 | SS | Pit | Basin | 1 |  |  |  |  |  |  |  |  |  | cc |  |  | 1 | 2 |  |  |
| Basin 8 | SS | Pit | Basin |  |  |  |  |  |  | 1 |  |  | 1 |  |  |  |  | 2 |  |  |
| Basin 9 | SS | Pit | Basin | 4 |  |  |  |  |  |  |  |  |  |  |  |  | 1 | 0 |  |  |
| Basin 1 | SS | Pit | Basin | 24 | 1 |  |  |  |  |  |  |  |  |  |  |  | 12 | 37 | P |  |
| Basin 11 | SS | Pit | Basin | 6 |  | 1 |  | 1 |  |  |  |  |  |  |  |  | 2 | 10 | P |  |
| Basin 12 | SS | Pit | Basin | 35 |  | 1 |  |  |  |  |  |  |  |  |  | 4 | 23 | 63 | P |  |
| Basin 13 | SS | Pit | Basin | 17 |  |  | 1 |  |  |  |  |  |  |  |  | 2 | 7 | 27 | P |  |
| Basin 14 | SS | Pit | Basin | 1 |  | 1 |  |  |  |  |  |  |  |  |  |  | 2 | 4 |  |  |
| Basin 15 | SS | Pit | Basin | 1 |  |  |  |  |  |  |  |  |  |  |  |  |  | 1 |  |  |
| Basin 16 | SS | Pit | Basin | 6 |  |  |  |  |  |  |  |  |  |  |  |  | 1 | 7 |  |  |
| Basin 17 | SS | Pit | Basin |  |  |  |  |  |  |  |  |  |  |  |  |  | 2 | 2 |  |  |
| Basin 18 | SS | Pit | Basin | 4 |  |  |  |  |  |  |  |  |  |  |  |  | 5 | 9 |  |  |
| Basin 19 | SS | Pit | Basin |  |  |  |  |  |  |  |  |  |  |  |  |  |  | 4 |  |  |
| Basin 2 | SS | Pit | Basin |  |  |  |  |  |  |  |  |  |  |  |  |  | 1 | 1 |  |  |
| Basin 21 | SS | Pit | Basin | 1 |  |  |  |  |  |  |  |  |  |  |  | 1 |  | 2 |  |  |
| Basin 22 | SS | Pit | Basin | 12 |  |  |  |  |  |  |  |  |  |  |  |  | 5 | 17 | P |  |
| Basin 23 | SS | Pit | Basin | 34 | 1 |  |  |  |  | 1 |  |  | 1 |  |  | 2 | 13 | 52 | P | P |
| Basin 24 | SS | Pit | Basin | 36 | 2 | 3 | 1 | 7 |  | 1 |  |  |  |  |  | 4 | 16 | 70 | P |  |
| Basin 25 | SS | Pit | Basin | 12 |  |  | 1 |  |  |  | 1 |  |  |  |  | 1 | 12 | 27 | P |  |
| Basin 26 | SS | Pit | Basin | 5 | 4 | 2 |  | 1 |  |  |  |  |  |  |  | 2 | 3 | 17 | P |  |
| Basin 27 | SS | Pit | Basin |  |  |  |  |  |  |  |  |  |  |  |  | 1 |  | 1 | P |  |
| Basin 28 | SS | Pit | Basin | 6 |  |  |  |  |  |  |  |  |  |  |  |  | 1 | 7 | P |  |
| Basin 29 | SS | Pit | Basin | 24 |  |  |  |  |  |  |  |  |  |  |  |  | 9 | 20 | P |  |
| Basin 3 | SS | Pit | Basin | 24 |  |  |  | 1 |  |  |  |  |  |  |  | 3 | 6 | 34 | P |  |
| Basin 31 | SS | Pit | Basin |  |  |  |  |  |  |  |  |  |  |  |  | 1 |  | 1 | P |  |
| Basin 32 | SS | Pit | Basin | 2 |  |  |  |  |  |  |  |  |  |  |  | 1 | 1 | 4 | P |  |
| Basin 33 | SS | Pit | Basin |  |  |  |  |  |  |  |  |  |  |  |  |  |  | 0 |  |  |
| Basin 34 | SS | Pit | Basin |  |  |  |  |  |  |  |  |  |  |  |  | 4 |  | 4 | P |  |
| Basin 35 | SS | Pit | Basin |  |  |  |  |  |  |  |  |  |  |  |  |  | 2 | 2 | P |  |
| Basin 36 | SS | Pit | Basin | 24 | 3 |  |  | 1 |  |  |  |  |  |  |  | 5 | 17 | 50 | P |  |
| Basin 37 | SS | Pit | Basin | 23 | 8 |  |  |  |  |  |  |  |  |  |  | 5 | 11 | 47 | P |  |
| Basin 38 | SS | Pit | Basin |  |  |  |  |  |  |  |  | 1 |  |  |  |  | 1 | 2 |  |  |
| Plate 1 | SS | Pit | Plate |  |  |  |  |  |  |  |  |  |  |  |  |  | 1 | 37 |  |  |
| Plate 2 | SS | Pit | Plate |  |  |  |  |  |  |  |  |  |  |  |  |  |  | 0 |  |  |
| Plate 3 | SS | Pit | Plate | 2 |  |  |  |  |  |  |  |  |  |  | 3 | 1 | 9 | 15 | P | P |
| Plate 4 | SS | Pit | Plate | 9 |  | 1 |  |  |  |  |  |  |  |  | 2 | 2 | 11 | 25 | P |  |
| Plate 5 | SS | Pit | Plate | 15 |  |  |  | 1 |  |  |  |  |  |  |  | 2 | 1 | 19 |  |  |
| Plate 6 | SS | Pit | Plate |  |  |  |  |  |  |  |  |  |  |  |  |  |  | 0 |  |  |
| Plate 7 | SS | Pit | Plate | 8 |  |  |  |  |  |  |  |  |  |  |  | 1 | 7 | 16 | P |  |
| Plate 8 | SS | Pit | Plate | 29 | 2 |  | 6 |  |  |  |  |  |  |  |  |  | 14 | 51 | P | P |
| Jar 1 | SS | Pit | Jar | 1 | 1 |  |  |  |  |  |  |  |  |  |  | 2 | 1 | 5 | P | P |
| Jar 2 | SS | Pit | Jar | 9 |  |  |  |  |  |  |  |  |  |  |  | 4 | 3 | 16 | P | P |
| Jar 3 | SS | Pit | Jar |  |  |  |  |  |  |  |  |  |  |  |  |  |  | 3 |  |  |
| Jar 4 | SS | Pit | Jar | 16 | 1 | 4 |  |  |  | 5 | 1 |  |  |  |  | 1 | 15 | 43 | P | P |
| Jar 5 | SS | Pit | Jar | 7 | 1 |  |  | 1 |  |  |  |  |  |  |  |  | 1 | 10 |  |  |
| Jar 6 | SS | Pit | Jar | 35 | 11 | 2 |  |  |  |  | 1 |  |  | 1 |  | 3 | 31 | 84 | P | P |
| Jar 7 | SS | Pit | Jar | 16 | 5 |  | 1 |  |  |  | 2 |  |  | 3 |  | 3 | 23 | 53 | P | P |
| Jar 8 | SS | Pit | Jar |  |  |  |  |  |  |  |  |  |  |  |  |  | 1 | 1 | P |  |
| Jar 9 | SS | Pit | Jar | 1 |  |  |  |  |  |  |  |  |  |  |  |  | 1 | 2 | P |  |
| Jar 1 | SS | Pit | Jar | 1 |  |  |  |  |  |  | 3 |  |  |  | 5 | 3 | 14 | 26 | P |  |
| Jar 11 | SS | Pit | Jar | 4 |  |  |  |  |  |  |  |  |  |  | 1 |  | 5 | 10 | P |  |
| Jar 12 | SS | Pit | Jar |  |  |  |  |  |  |  |  |  |  |  |  | 2 |  | 2 | P | P |
| Jar 13 | SS | Pit | Jar | 25 | 2 | 1 | 1 |  |  |  |  |  |  |  |  | 6 | 1 | 4 | P | P |
| Jar 14 | SS | Pit | Jar | 3 |  |  |  |  |  |  |  |  |  |  |  |  |  | 3 |  |  |
| Jar 15 | SS | Pit | Jar |  |  |  |  |  |  |  |  |  |  |  |  |  |  | 0 |  |  |
| Jar 16 | SS | Pit | Jar | 15 | 2 | 5 |  |  |  |  | 1 |  |  | 1 |  |  | 8 | 32 | P | P |
| Jar 17 | SS | Pit | Jar | 21 | 3 | 3 |  | 1 |  | 1 | 3 |  |  |  | 3 |  | 16 | 51 | P | P |
| Jar 18 | SS | Pit | Jar | 7 |  | 1 |  |  |  |  |  |  | 1 |  |  | 2 | 3 | 14 | P |  |
| Jar 19 | SS | Pit | Jar | 3 |  |  |  |  |  |  |  |  |  |  |  | 1 | 4 | 8 | P |  |
| Jar 2 | SS | Pit | Jar |  |  |  |  |  |  |  |  |  |  |  |  |  |  | 0 |  |  |
| Jar 21 | SS | Pit | Jar | 11 | 1 |  |  |  |  |  |  |  |  |  |  |  | 9 | 21 | P |  |
| Jar 22 | SS | Pit | Jar | 9 | 1 |  |  |  |  |  |  |  |  | 1 |  | 2 | 17 | 30 | P | P |
| Jar 23 | SS | Pit | Jar | 11 |  | 1 |  |  |  |  |  |  |  |  |  |  | 5 | 36 | P |  |
| Jar 24 | SS | Pit | Jar | 3 | 1 |  |  |  |  |  |  |  |  |  | 1 |  | 3 | 8 |  | P |
| Jar 25 | SS | Pit | Jar | 28 |  |  |  |  |  |  | 2 |  |  |  |  |  | 4 | 34 | P | P |
| HHS_POT1 | HHS | Pit | Jar | 2 |  |  |  |  |  |  | 1 |  |  |  |  |  |  | 3 |  |  |
| HHS_POT2 | HHS | Pit | Jar | 2 | 2 |  | 1 |  |  |  | 4 |  |  |  |  | 3 |  | 12 |  |  |
| HHS_POT3 | HHS | Pit | Jar | 1 |  |  | 1 |  |  |  | 2 |  |  |  |  | 5 |  | 9 |  |  |
| HHS_POT4 | HHS | Pit | Jar | 19 |  |  |  |  |  |  |  |  |  |  |  |  |  | 19 |  |  |
| GS1 | SS | Pit | Grinding stone | 73 | 5 | 1 |  |  |  |  | 1 |  |  |  |  |  | 14 | 94 | P |  |
| GS2 | SS | Cultural layer | Grinding stone | 48 | 3 | 2 | 1 | 1 |  |  |  |  |  |  |  | 3 | 42 | 100 | P |  |
| GS3 | SS | Cultural layer | Grinding stone | 81 | 8 |  | 2 | 4 |  |  | 3 |  |  |  |  | 2 | 32 | 132 | P |  |
| GS4 | SS | Cultural layer | Grinding stone | 81 | 14 | 3 | 5 | 5 | 2 |  |  | 1 |  |  |  | 9 | 33 | 0 | P | P |
| GS5 | SS | Pit | Grinding stone | 35 | 2 |  |  | 3 |  | 1 |  |  |  | 1 |  |  | 15 | 37 | P |  |
| GS6 | SS | Pit | Grinding stone | 57 | 1 | 2 |  | 2 |  |  |  |  |  |  |  | 5 | 15 | 10 | P |  |
| GS7 | SS | Pit | Grinding stone | 27 | 2 | 1 | 2 | 1 |  |  | 1 |  |  |  |  | 2 | 3 | 63 | P |  |
| GS8 | SS | Cultural layer | Grinding stone | 23 | 3 |  |  |  |  |  |  |  |  |  |  |  | 12 | 27 | P |  |
| GS9 | SS | Cultural layer | Grinding stone | 14 | 2 |  | 1 |  |  |  |  |  |  |  |  | 1 | 9 | 4 | P |  |
| GS10 | SS | Cultural layer | Grinding stone | 13 |  |  |  |  |  |  |  |  |  |  | 1 |  | 2 | 1 | P |  |
| GS11 | SS | Pit | Grinding stone | 45 | 1 | 1 |  |  |  |  |  | 1 |  | 2 |  | 4 | 1 | 7 | P |  |
| GS12 | SS | Cultural layer | Grinding stone | 42 | 1 | 3 | 1 | 2 |  |  |  |  |  | 1 |  | 7 | 1 | 2 | P |  |
| GS13 | SS | Pit | Grinding stone | 29 |  |  |  |  |  |  |  |  |  |  |  | 3 | 12 | 9 | P |  |
| GS14 | SS | Cultural layer | Grinding stone | 2 |  |  |  |  |  |  |  |  |  |  |  |  | 6 | 37 | P |  |
| GS15 | SS | Pit | Grinding stone | 31 |  | 1 | 2 |  |  |  | 1 |  |  |  |  | 1 | 4 | 40 | P |  |
| GS16 | SS | Pit | Grinding stone | 22 | 2 | 1 |  | 1 |  | 1 |  |  |  |  |  | 2 | 7 | 36 | P |  |
| GS17 | SS | Cultural layer | Grinding stone |  |  |  |  |  |  |  | 4 |  |  |  |  | 1 | 1 | 6 | P |  |
| GS18 | SS | Cultural layer | Grinding stone | 8 |  |  |  |  |  |  | 2 |  |  |  |  | 1 | 1 | 12 |  |  |
| GS19 | SS | Pit | Grinding stone | 4 |  |  |  |  |  |  |  |  |  |  |  |  | 1 | 5 |  |  |
| GS20 | SS | Pit | Grinding stone | 1 |  |  |  |  |  |  |  |  |  |  |  |  | 3 | 4 |  |  |
| GS21 | SS | Pit | Grinding stone | 18 |  |  |  |  |  |  |  |  |  |  |  |  | 8 | 26 |  |  |
| GS32 | SS | Pit | Grinding stone | 39 | 2 | 3 | 1 | 3 |  |  |  |  |  | 1 |  | 3 | 8 | 60 |  |  |
| HHS_GS4 | HHS | Pit | Grinding stone | 1 | 1 |  |  |  |  |  | 1 |  |  |  |  |  |  | 3 |  |  |
| HHS_GS5 | HHS | Pit | Grinding stone | 5 | 2 |  |  |  |  |  | 2 |  |  |  |  | 2 | 9 | 20 |  |  |
| HHS_GS6 | HHS | Pit | Grinding stone |  |  |  |  |  |  |  |  |  |  |  |  |  | 2 | 2 |  |  |
| Ubiquity |  |  |  | 0.8 | 0.35 | 0.26 | 0.17 | 0.2 | 0.01 | 0.07 | 0.2 | 0.03 | 0.03 | 0.08 | 0.07 | 0.48 | 0.79 |  |  |  |
| Control 1 | SS | Jar 16 exterior surface | |  |  |  |  |  |  |  |  |  |  |  |  |  |  | 0 |  |  |
| Control 2 | SS | Basin 16 exterior surface | |  |  |  |  |  |  |  |  |  |  |  |  |  |  | 0 |  |  |
| Control 3 | SS | Plate 1 exterior surface | |  |  |  |  |  |  |  |  |  |  |  |  |  |  | 0 |  |  |
| Control 4 | SS | Basin 23 exterior surface | |  |  |  |  |  |  |  |  |  |  |  |  |  | 2 | 2 |  |  |
| Control 5 | SS | Basin 29 exterior surface | |  |  |  |  |  |  |  |  |  |  |  |  |  | 2 | 2 |  |  |
| Control 6 | SS | Basin 37 exterior surface | |  |  |  |  |  |  |  |  |  |  |  |  |  |  | 0 |  |  |
| Control 7 | SS | Basin 22 exterior surface | |  |  |  |  |  |  |  |  |  |  |  |  |  | 1 | 1 |  |  |
| Control 8 | SS | GS 2 surface soil | |  |  |  |  |  |  |  |  |  |  |  |  |  | 1 | 1 |  |  |
| Control 9 | SS | Jar 11 exterior surface | |  |  |  |  |  |  |  |  |  |  |  |  |  |  | 0 |  |  |
| Control 10 | SS | Basin 24 exterior surface | | 24 |  |  |  |  |  |  |  |  |  |  |  |  |  | 24 |  |  |
| Control 11 | SS | Plate 6 surface soil | | 3 |  |  |  |  |  |  |  |  |  |  |  |  |  | 3 |  |  |
| Control 12 | SS | Basin 28 exterior surface | |  |  |  |  |  |  |  |  |  |  |  |  |  |  | 0 |  |  |

SS=Shangshan

HHS=Hehuashan

P=Present
